# Supplementary material
Source: publisher figshare collection journal article supplement (https://karger.figshare.com/articles/dataset/_/5123104)

# NESTED RT-PCR FOR BCR-ABL TRANSCRIPT DETECTION

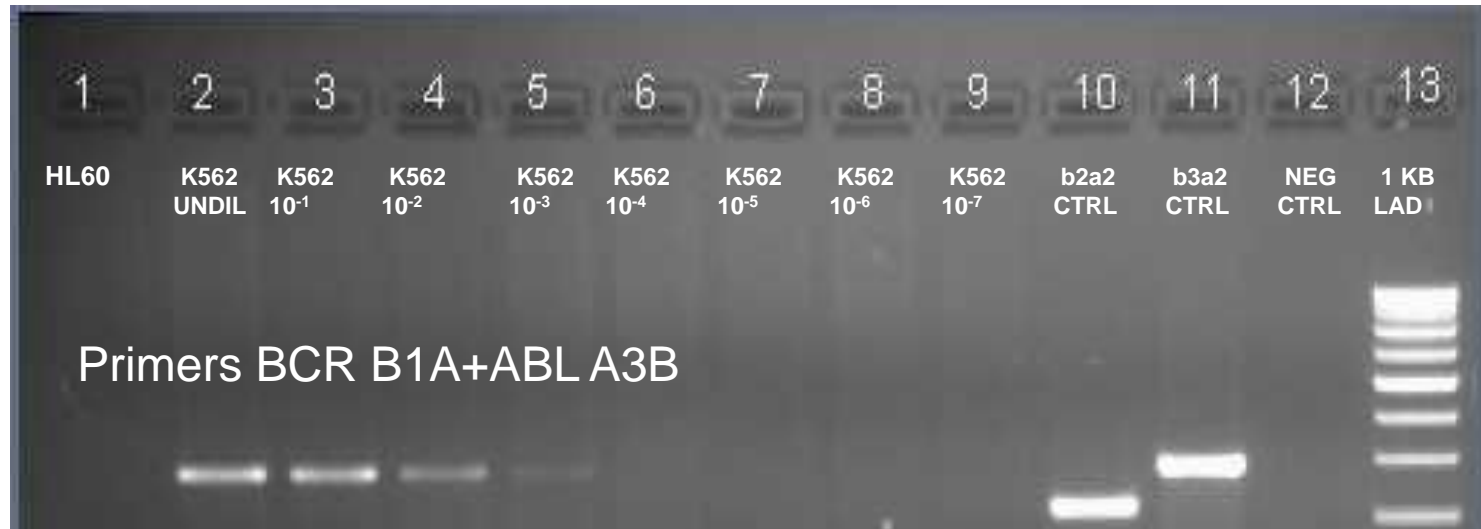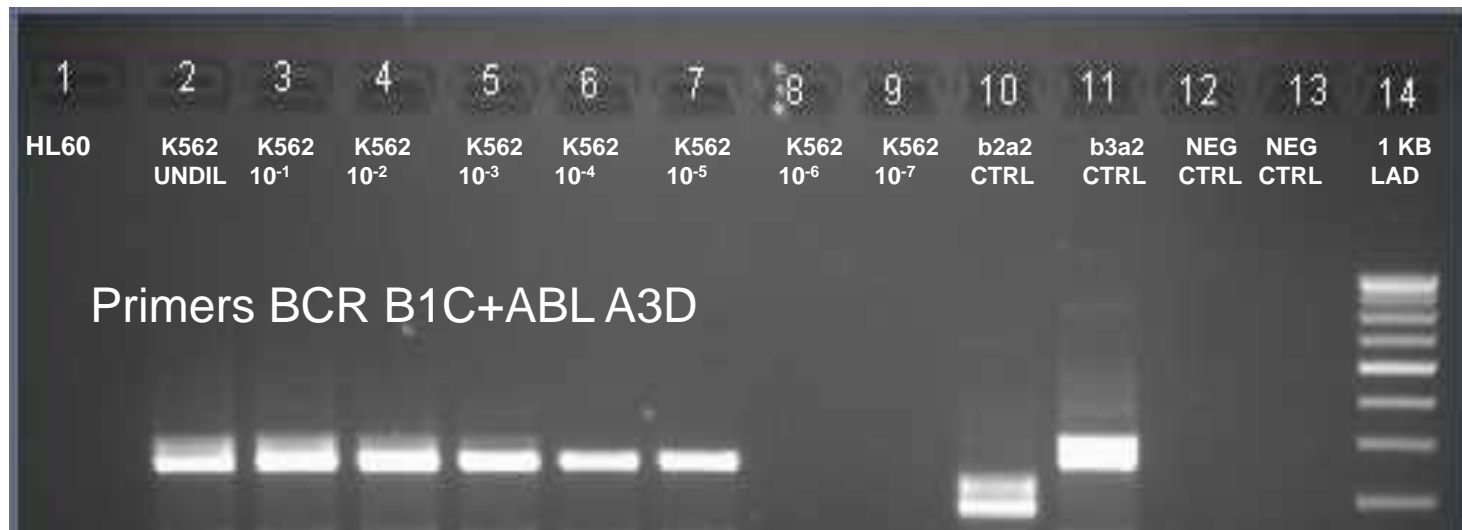

Supplement: Supplementary file 1 [file 1]
